# Supplementary material for: The Single-Stranded DNA-Binding Gene Whirly (Why1) with a Strong Pathogen-Induced Promoter from Vitis pseudoreticulata Enhances Resistance to Phytophthora capsici
Source: MDPI journal article supplement (doi:10.3390/ijms23148052), 2022-07-21
Supplement: s1 [file s1]

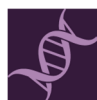

## Supplementary Material

# The Single-Stranded DNA-Binding Gene *Whirly* (*Why1*) with a Strong Pathogen Induced Promoter from *Vitis pseudoreticulata* Enhances Resistance to *Phytophthora capsici*

Chengchun Lai <sup>1</sup>, Qiuxia Que <sup>1</sup>, Ruo Pan <sup>1</sup>, Qi Wang <sup>1</sup>, Huiying Gao <sup>1</sup>, Xuefang Guan <sup>1</sup>, Jianmei Che <sup>2,\*</sup> and Gongti Lai <sup>1,\*</sup>

<sup>1</sup> Institute of Agricultural Engineering Technology, Fujian Academy of Agricultural Sciences, Fuzhou 350003, China; lccisland@163.com (C.L.); queqiuxia2020@163.com (Q.Q.); rrpanpan@163.com (R.P.); nkywq@163.com (Q.W.); faas14061407@163.com (H.G.); guan-619@163.com (X.G.)

<sup>2</sup> Institute of Agricultural Bio-Resources Research, Fujian Academy of Agricultural Sciences, Fuzhou 350003, China

\* Correspondence: chejianmei@faas.cn (J.C.); laigongti@faas.cn (G.L.)

## Supplementary Table

**Table S1: Sequence information of *Why1* and promoter**

| Genes/<br>promoters    | GenBank<br>ID | Sequence<br>length/bp | ORF<br>length/bp | Number of<br>exon/intron | Amino acid<br>number | Molecular<br>weight/kD | Theoretical<br>pI | Hydro-<br>pathicity | Subcellular<br>localization |
|------------------------|---------------|-----------------------|------------------|--------------------------|----------------------|------------------------|-------------------|---------------------|-----------------------------|
| <i>VvWhy1</i>          | MN395403      | 862                   | 807              | 7/6                      | 268                  | 68.33                  | 5.1               | 0.762               | Chloroplast                 |
| <i>VpWhy1</i>          | MN395402      | 862                   | 807              | 7/6                      | 268                  | 68.28                  | 5.1               | 0.755               | Chloroplast                 |
| <i>VvWhy1 promoter</i> | MN397251      | 1127                  |                  |                          |                      |                        |                   |                     |                             |
| <i>VpWhy1 promoter</i> | MN397250      | 1136                  |                  |                          |                      |                        |                   |                     |                             |

**Table S2: Primer sequence**

| Primer name         | Primer sequence                     | Vector or purpose                                  |
|---------------------|-------------------------------------|----------------------------------------------------|
| <i>Why1-F</i>       | GGTTAAGAAGAATAGAGGCGGAAG            | Gene cloning of <i>VvWhy1</i> and<br><i>VpWhy1</i> |
| <i>Why1-R</i>       | CAGTCCATGCTTTAGAAGTACCAG            |                                                    |
| <i>p-F</i>          | TGAGTTATGACTTTATTGTTTCTCCTT         | Promoter cloning of <i>pVv</i> and<br><i>pVp</i>   |
| <i>p-R</i>          | GATGCATTCTTCCGCCTCTATTCTTCT         |                                                    |
| <i>Why1-gfp-F</i>   | CGGGATCCATGCATCACCTGCACCTGCTTTC     | pBI121- <i>Why1</i> -GFP                           |
| <i>Why1-gfp-R</i>   | GGGGTACCCCTCTGCTCCATTCAAAGTCCCCAG   |                                                    |
| <i>p-GUS-F</i>      | CCCAAGCTTTGAGTTATGACTTTATTGTTTCTC   | pBI121- <i>pWhy1::GUS</i>                          |
| <i>p-GUS-R</i>      | TCCCCCGGGTCTTCCGCCTCTATTCTTCTTAAC   |                                                    |
| <i>p-Why1-gfp-F</i> | ATGCCTGCAGGTGAGTTATGACTTTATTGTTTCTC | pBI121- <i>pWhy1::Why1</i> -GFP                    |
| <i>p-Why1-gfp-R</i> | CGGGATCCTCTTCCGCCTCTATTCTTCTTAAC    |                                                    |
| <i>Why1-q-F</i>     | AGCAGAACATCACTCGCA                  | q-RT-PCR                                           |
| <i>Why1-q-R</i>     | TTGGGCTCTACCGTAAGA                  |                                                    |
| <i>NbPRL-q-F</i>    | CCGTTGAGATGTGGGTCAAT                |                                                    |
| <i>NbPRL-q-R</i>    | CGCCAAACCACCTGAGTATAG               |                                                    |

|                                    |                         |
|------------------------------------|-------------------------|
| <i>NbPR2-q-F</i>                   | CAACCCGCCCAAAGATAGTA    |
| <i>NbPR2-q-R</i>                   | TGGCTAAGAGTGGAAGGTTATG  |
| <i>NbPR4-q-F</i>                   | GGATGATGTTGACAGCAGAGA   |
| <i>NbPR4-q-R</i>                   | GTAGGACACGAGGTAGGTATCA  |
| <i>NbPR5-q-F</i>                   | GCTCGATTACGTCTTGTCTCTC  |
| <i>NbPR5-q-R</i>                   | CTCTAGCATGGTGGATTGACTT  |
| <i>NbPR10-q-F</i>                  | GAAGAAGAACAATGAAGGCA    |
| <i>NbPR10-q-R</i>                  | CAGTAGGATTGGCAAGAAGGTA  |
| <i>V-EF1<math>\alpha</math>-F</i>  | GAACTGGGTGCTTGATAGGC    |
| <i>V-EF1<math>\alpha</math>-R</i>  | ACCAAAATATCCGGAGTAAAAGA |
| <i>Nb-EF1<math>\alpha</math>-F</i> | AGAGGCCCTCAGACAAAC      |
| <i>Nb-EF1<math>\alpha</math>-R</i> | TAGGTCCAAAGGTCACAA      |

Red letters indicate restriction enzyme sites, GGATCC: *Bam*HI; GGTACC: *Kpn*I; AAGCTT: *Hind*III; CCCGGG: *Sma*I; *Sbf*I: CCTGCAGG.

*Why1-gfp-F* and *Why1-gfp-R* were used to construct pBI121-*VvWhy1-GFP* and pBI121-*VpWhy1-GFP* for subcellular localization verification.

*p-GUS-F* and *p-GUS-R* were used to construct pBI121-*pVv::GUS* and pBI121-*pVp::GUS* for promoter GUS activity assay.

Based on the constructs of pBI121-*VvWhy1-GFP* and pBI121-*VpWhy1-GFP*, *p-Why1-gfp-F* and *p-Why1-gfp-R* were used to construct pBI121-*pVv::VvWhy1-GFP*, pBI121-*pVv::VpWhy1-GFP*, pBI121-*pVp::VvWhy1-GFP* and pBI121-*pVp::VpWhy1-GFP* for *Ph. Capsici* resistance experiments in *N. benthamiana*.

## Supplementary Sequence

### Sequence S1: *VvWhy1*

>*VvWhy1* ORF 26-832 bp

GGTTAAGAAGAATAGAGGCGGAAGAATGCATCACCTGCACCTGCTTTCTTCCTCATTACCATCCAAAACCC  
TAGATTATGCCCTAATCACTCCCTTTCTCGCTCCACTCCTCCTCACCCTTGAGCTTCACTTCACGAACCTCTCT  
TCTGCTTTCCACAACCAGGCTCTTCCGTAAAAAGCGCTCATTGCAATGTCGCCAGTCGGATTACTTTCAACAG  
CAGAACATCACTCGCAGACAACCTCCAAATGACTCTTCTTTTGGAGGAGCTTTGCAGCCTAGGGTTTTTGTG  
GTCATTTCGATATACAAAGGGAAAGCTGCTCTTACGGTAGAGCCCAAAGCCCCGGAGTTTACACCTTTAGATT  
CAGGGGCATTTAAAGTGTCCAAAGAAGGTTTTGTGCTGCTCCAGTTTGCTCCTGCTGCAGGTGTTGACAATA  
TGATTGGGGCAGAAAGCAGGTGTTCTCATTATCTGTGACTGAAATTGGAAGTCTTATTAGCCTTGGTGCAAGA  
GAGTCATGCGAATTTTTTTCATGATCCTTTTAAAGGAAGAAGTGAGGAAGGTAAGGTCCGGAAGGTGTTGAAG  
GTAGAGCCGCTCCCAGATGGCTCTGGTCATTTCTTCAATCTCAGTGTTCAAAACAAGCTTTTGAATATGGATG  
AGAACATTTATATCCCTGTCACCAGAGCAGAAATTTGCTGTGCTCATCTCAGCTTTTAAATTCATTGTGCCATAT  
CTTTTAGGCTGGCATGCCTATGCGAACTCCATCAAGCCAGATGATACAAGTCGTGTGAATAATGCTAATCCGA  
GATCTGGGGACTTTGAATGGAGCAGATAGTAAACACTGGTACTTCTAAAGCATGGACTG

### Sequence S2: *VpWhy1*

>*VpWhy1* ORF 26-832 bp

GGTTAAGAAGAATAGAGGCGGAAGAATGCATCACCTGCACCTGGTTTCTTCCTCATTACCATCCAAAACCC  
TAGATTATGCCCTAATCACTCCCTTTCTCGCTTCACTCCTCCTCACCCTTGAGCTTCACTTCACGAACCTCTCT  
TCTGCTTTCCACAACCAGGCACTTCTTAAAAAGCGCTCATTGCAATGTCGCCAGTCGGATTACTTTCAACAG

CAGAACATCACTCGCAGACAACCTCCAAATGACTCTTCTTTTGGAGGAGCTTTGCAGCCTAGGGTTTTTGTG  
 GTCATTTCGATATACAAAGGGAAAGCTGCTCTTACGGTAGAGCCCAAAGCCCCGGAGTTTACGCCTTTAGATT  
 AGGGGCATTTAAAGTGTCCAAAGAAGGTTTTGTGCTGCTCCAGTTTGCTCCTGCTGCAGGTGTTGACAATAT  
 GATTGGGGCAGAAAGCAGGTGTTCTCATTATCTGTGACTGAAATTGGAAGTCTTATTAGCCTTGGTGCAAGAG  
 AGTCATGCGAATTTTTTCATGATCCTTTTAAAGGAAGAAGTGAGGAAGGTAAGGTCCGGAAGGTGTTGAAGG  
 TAGAGCCGCTCCAGATGGCTCTGGTCATTTCTTCAATCTCAGTGTTCAAACAAGCTTTTGAATATGGATGA  
 GAACATTTATATCCCTGTCACCAGAGCAGAATTTGCTGTGCTCATCTCAGCTTTTAATTTATTGTGCCATATCT  
 TTTAGGCTGGCATGCCTATGCGAACTCCATCAAGCCAGATGATACAAGTCGTGTGAATAATGCTAATCCGAG  
 ATCTGGGGACTTTGAATGGAGCAGATAGTAAACACTGGTACTTCTAAAGCATGGACTG

### Sequence S3: *VvWhy1* promoter

>*VvWhy1* promoter (pVv) 1127 bp

TGAGTTATGACTTTATTGTTTCTCCTTTATACACAATTATAGTTTTTGAATTTAGATAAATAGATTATAAATTAA  
 GTAAGAAATAATTAATAATTTAAATTCTTTAATAATTTTAAATAAAAATTTAAGAATAATTTAGAATAAAAAAA  
 CCAATTTAATTAATTGTAAATTAATTAATAAAACATTTTAAAATATTATATTGTAATTCAATACTAAATGTGTAC  
 ACGAAATAAAAACTTGACTTATTTACGTATTAAAAAAGTTAAAAATTTATTATTTATTCATTTTAAATAAAAT  
 ATTTCTAAAACCTTATTATTCTAAATTGTTATTATTCATTTAAGAAAAAAAATTACGAAGATGTTAATATCCTAT  
 GGTTTTAATATATACTAAAATAATATTTTTTTAATAAAAAAGATATAATTTATGATTTTATTATAATATTATTATT  
 AATGTTTTATTAAAACTATATATTTTTTTAATTTATTGTGAATTACAAAACCTATTTTTATTGTTAATAAGACTTG  
 AATTAAATTTAATTAATATTATATAAATTGAATTAGTAATGTTTTTATAAAATAAAAAAAAATCAATTTTAG  
 AAACAGTTTATCCAAGAAAATCAAATCATTTTATACAAACAAGTTTTTGTTTTTTATTTTGAAAAAAGTTTTTA  
 AAAACAATTAGTCAAACACTCTTATATTTATAAAATACAAGAAAACCTGTTTTATATTCTTTAATTTAAAAAC  
 AATTTTTTAAAAACAAATTTAAGAAAATATGACCAAATAGATCCTAATTTTTTTGGAAATAATTCTTAAAAAT  
 AATTTTTTATTTTCAATAATATATTTTTTTGTCCCACTTAATTTTTATGAAAATATCTCATATAGTGTAATTT  
 CGAAAAATAACATATTCTCAAAACAAATTTCAAAAAAAATTTGTATTAAAAATTTAAAGGGGCTTGAGATT  
 TCCTAAGATGCCAACAGACTTTTTATTCTCACGAAATTAACTTTTGTAAATATAGTAATAAGAAACGGCAGCGT  
 GCCTCAGGGCATCGTCAGCAGCCTCATTGCTTCAAAGTTAAAAGCTCTATCTCCGAAGCGAAATTGGGGGTT  
 AAGAAGAATAGAGGCGGAAGAATGCATC

### Sequence S4: *VpWhy1* promoter

>*VpWhy1* promoter (pVp) 1136 bp

TGAGTTATGACTTTATTGTTTCTCCTTTATACACAATTATAGTTTTTGAATTTAGATAAATAGATTATAAATTAA  
 GTAAGAAATAATTAATAATTTAAATTCTTTAATAATTTTAAAAATTTTAAAGAATAATTTAGAATTCAAAAA  
 AACCAATTTAATTAATTGTAAATTAATTAATAAAACATTTTAAAATATTATATTGTAATTCAATACTAAATGTGT  
 ACACGATATAAAAACTTGACTTATTTACATATTAAAAAAGTTAAAAATTTATTTTTTATTCATTTTAAATAAAC  
 TATTTCTAAAATTATTATTCTAAATTGTTATTATTCATTTAAGAAAAAAAATTGAAGATGTTAATATCCTTA  
 TGGTTTTAATATATAAATAAATAATTTTTTTTTAATAAAAAAATATAATTTATGATTTTATTATAATATTATTA  
 TTAATGTTTTATTAAAACTATATATATTTTTTAATTTATTGTGAATTAAAAAACTATCTTTATTGTTAATAAGA  
 CTTGAATTAAATTTAATTAATATTATATAAATTGAATTAGTAATGGTTTATAAAATCAAAAAAAGAAAAAATC  
 ATTTTATAGAAACAGTTTATTCAAGAAAATCAAATCATTTTATACAAACAAGTTTTTTGTTTTTTATTTTGAAATT  
 TTTTTTAAAAACAATTCGTCAAACACTCTTATATTTATAAAACACAAGAAAACCTGTTTTATTTTTTTAATTT  
 AAAACAATTTTTTAAAAACAAATTTAAAAAGATATGACCAAATAGACCCTAATTTTTTTGAAAATAATTCTT

AAAAATAATTTTTTATTTTCAATAATATTTTTTTTTTGTCCCAACTTAATTTTATGAAAATATCTCATATAGTGT  
AAATTTCAAAAAATAACATATTCTCAAAACGAATTTTCAAAAAAAATTTGTATTAAAAGTTTAAAGGGGCTT  
GAGATTTCTAAGATGCCAGCAGACTTTTTATTCTCACGAAATTAACTTTTGTAATTTAGTAATAAGAAACGG  
CAGCGTGCCTCAGGGCATCGTCAGCAGCCTCATTGCTTCAAAGTTAAAAGCTCTATCTTCCGAAGCGAAATTG  
GGGGTTAAGAAGAATAGAGGCGGAAGAATGCATC
